# Supplementary material
Source: PubMed Central journal article supplement (PMC6348146)

# APPENDIX

## QoL-CI Severity and Frequency Ratings Scale: Professionals

**Instructions:** For each item below, please rate how severely (e.g., how much interference is experienced) and frequently you think performance in each domain affects the daily functioning and quality of life of children with CIs.

### 1) Physical functioning (e.g., coordination, balance, or playing sports)

*How much is physical functioning affected in children with CIs?*

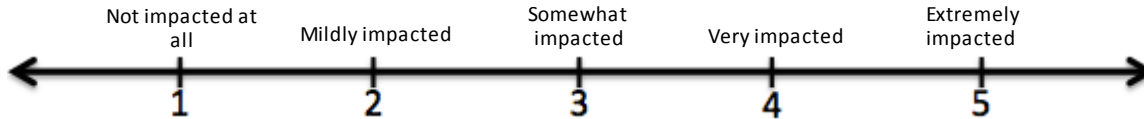

*How often is physical functioning affected in children with CIs?*

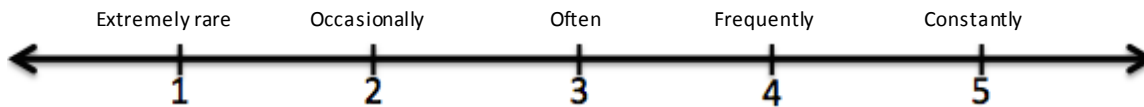

### 2) Expressive language (e.g., communication skills)

*How much is expressive language affected in children with CIs?*

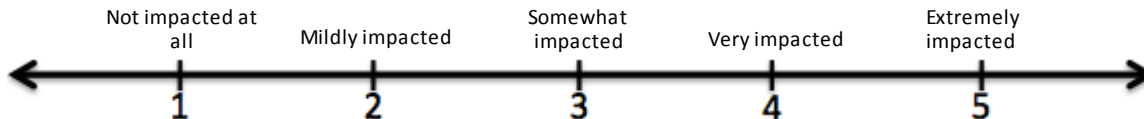

*How often is expressive language affected in children with CIs?*

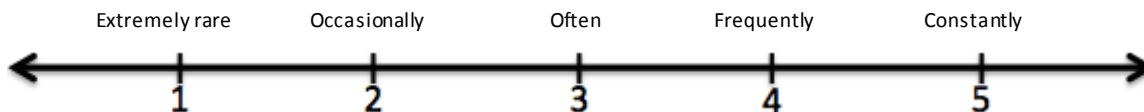

### 3) Receptive language (e.g., ability to understand in different environments)

*How much is receptive language affected in children with CIs?*

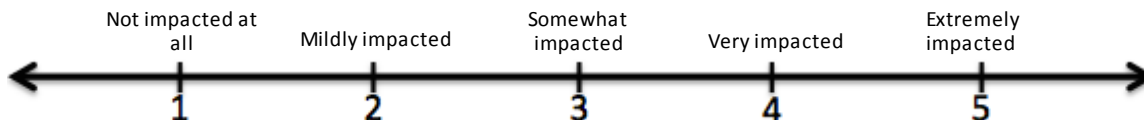

*How often is receptive language affected in children with CIs?*

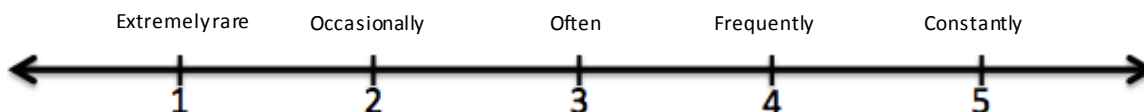

**4) Device management (e.g., use of device and cleaning/trouble shooting)**

*How difficult is it for children with (a) CI(s)/parents to manage their device(s)?*

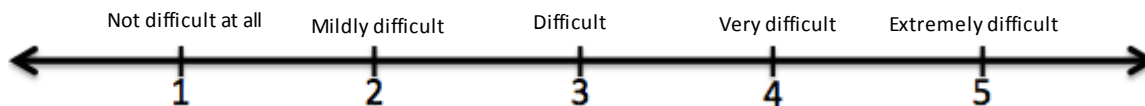

*How often do you think device management issues occur?*

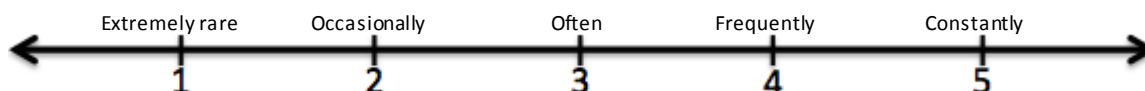

**5) Behavioral difficulties (e.g., impulsivity/hyperactivity)**

*How severe are behavioral difficulties in children with CIs?*

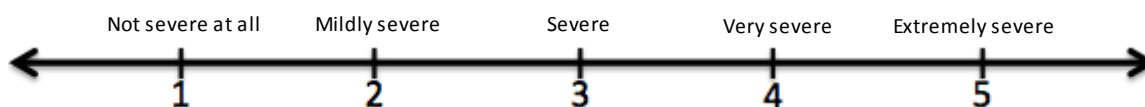

*How often do behavioral difficulties occur in children with CIs?*

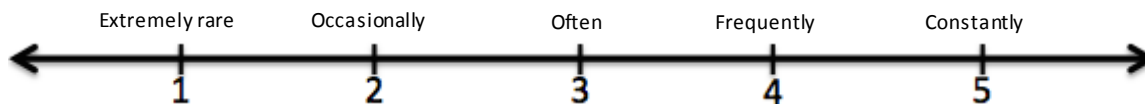

**6) Mood (i.e., being anxious or upset, happy, excited)**

*How much is mood affected in children with CIs?*

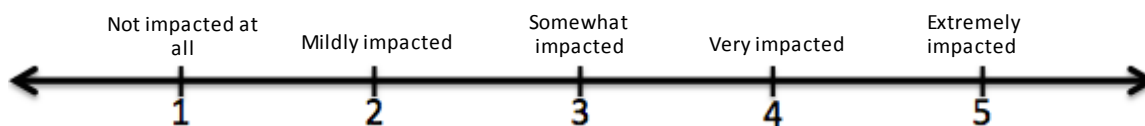

*How often is mood affected in children with CIs?*

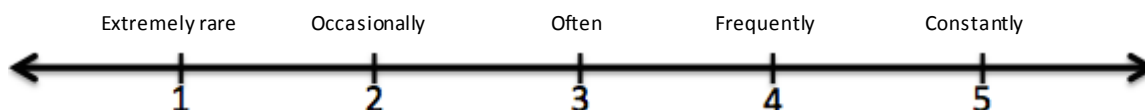

**7) Self-esteem (e.g., how positive they view themselves)**

*How much is self-esteem affected in children with CIs?*

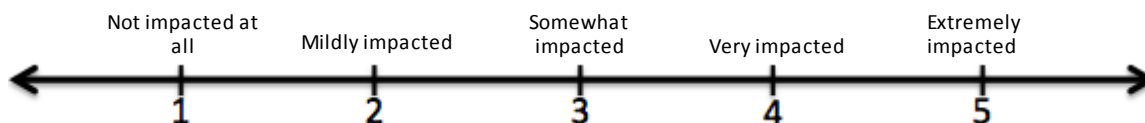

How often is self-esteem affected in children with CIs?

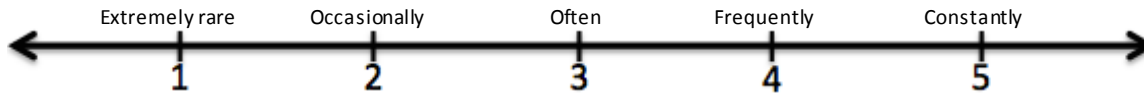

**8) Family relationships (e.g., how they get along with their parents/siblings)**

How much are family relationships affected in children with CIs?

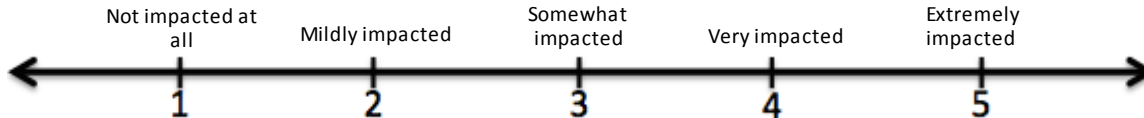

How often are family relationships affected in children with CIs?

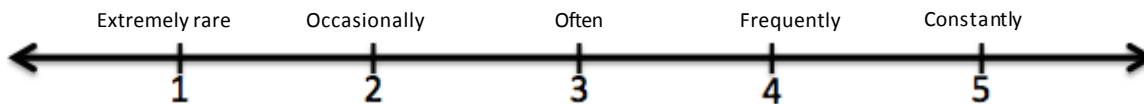

**9) Peer Relationships (e.g., how they get along with their friends)**

How much are peer relationships affected in children with CIs?

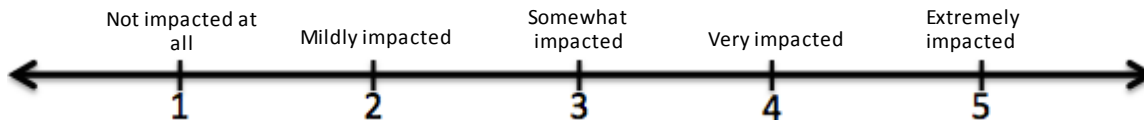

How often are peer relationships affected in children with CIs?

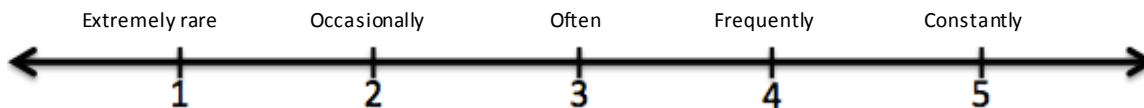

**10) School performance (e.g., progress in school; grades)**

How much is school performance affected in children with CIs?

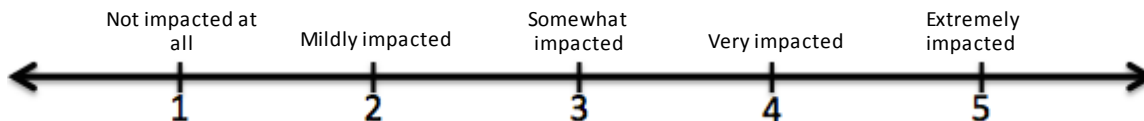

How often is school performance affected in children with CIs?

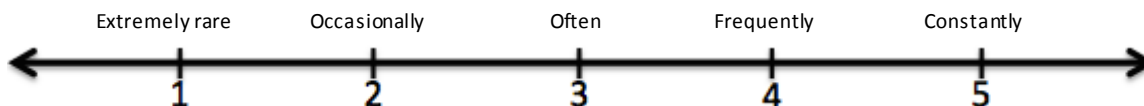

## QoL-CI Severity and Frequency Ratings Scale: Parents

**Instructions:** For each item below, please rate how severely (e.g., how much interference is experienced) and frequently you think performance in each domain affects the daily functioning and quality of life of your child with (a) CI(s).

### 1) Physical functioning (e.g., coordination, balance, or playing sports)

*How much is your child's physical functioning affected by his/her hearing loss/CI(s)?*

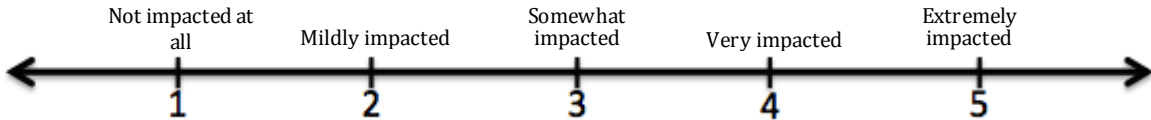

*How often is your child's physical functioning affected by his/her hearing loss/CI(s)?*

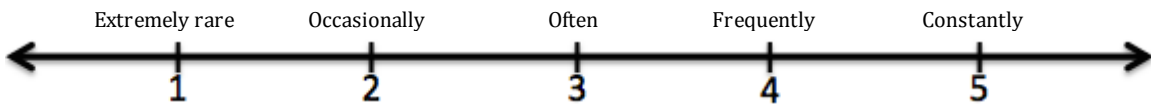

### 2) Expressive language (e.g., communication skills)

*How much is your child's expressive language affected by his/her hearing loss/CI(s)?*

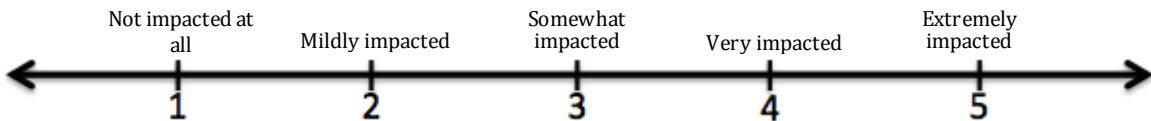

*How often is your child's expressive language affected by his/her hearing loss/CI(s)?*

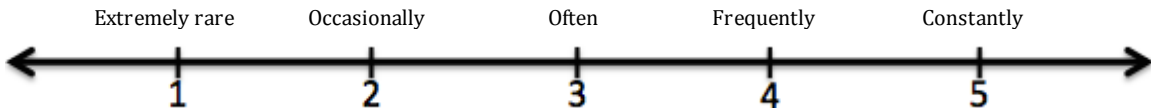

### 3) Receptive language (e.g., ability to understand in different environments)

*How much is your child's receptive language affected by his/her hearing loss/CI(s)?*

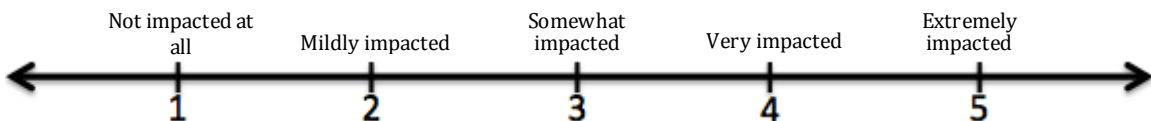

*How often is your child's receptive language affected by his/her hearing loss/CI(s)?*

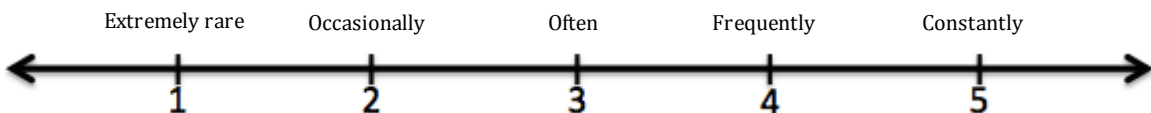

**4) Device management (e.g., use of device and cleaning/trouble shooting)**

*How difficult is it for you and your child to manage their device(s)?*

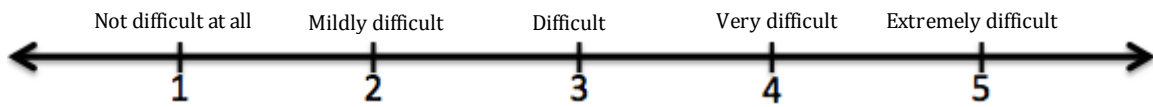

*How often do you think device management issues occur?*

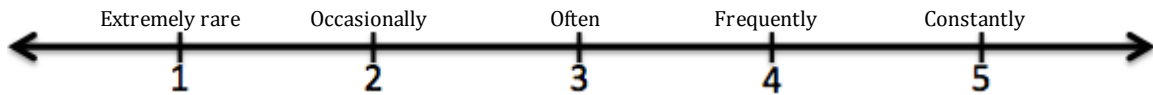

**5) Behavioral difficulties (e.g., impulsivity/hyperactivity)**

*How severe are your child's behavioral difficulties?*

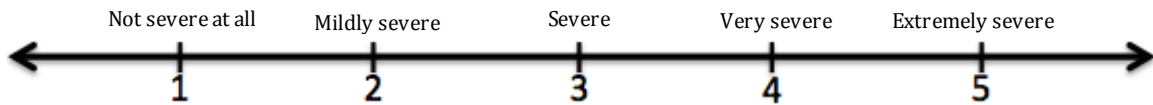

*How often do these behavioral difficulties occur?*

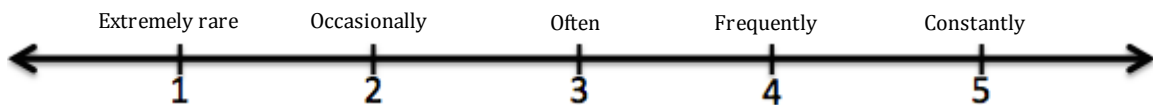

**6) Mood (i.e., being anxious or upset, happy, excited)**

*How much is your child's mood affected by his/her hearing loss/CI(s)?*

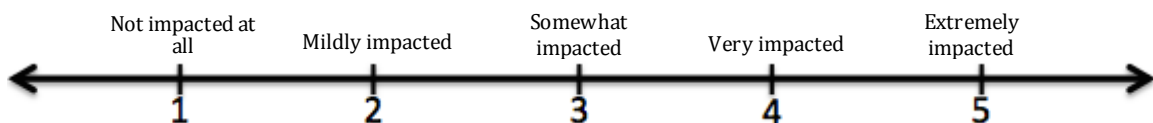

*How often is your child's mood affected by his/her hearing loss/CI(s)?*

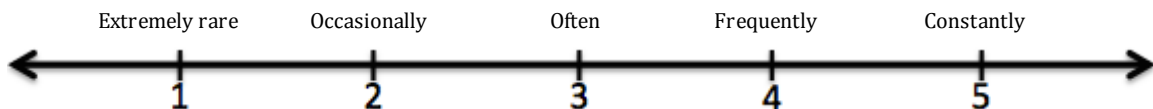

**7) Self-esteem (e.g., how positive they view themselves)**

*How much is your child's self-esteem affected by his/her hearing loss/CI(s)?*

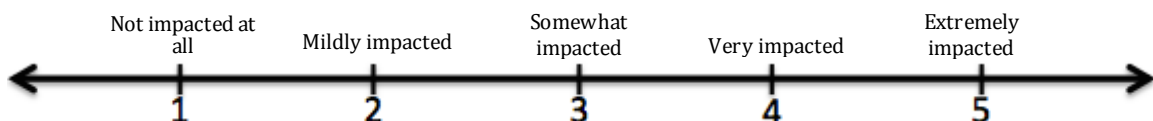

*How often is your child's self-esteem affected by his/her hearing loss/CI(s)?*

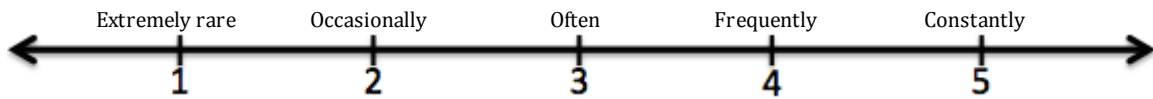

**8) Family relationships (e.g., how they get along with their siblings/other family members)**

*How much are your child's family relationships affected by his/her hearing loss/CI(s)?*

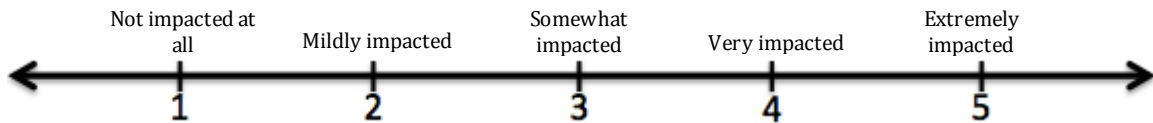

*How often are your child's family relationships affected by his/her hearing loss/CI(s)?*

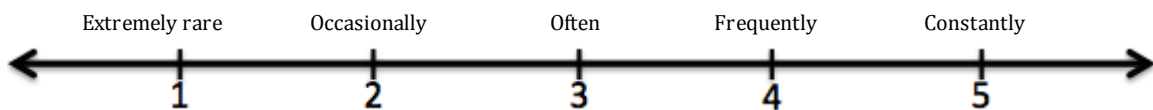

**9) Peer Relationships (e.g., how they get along with their friends)**

*How much are your child's peer relationships affected by his/her hearing loss/CI(s)?*

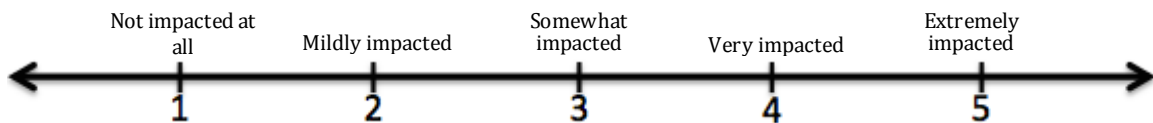

*How often are your child's peer relationships affected by his/her hearing loss/CI(s)?*

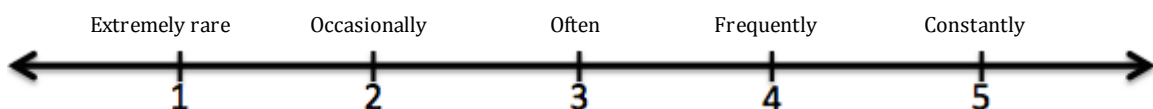

**10) School performance (e.g., progress in school; grades)**

*How much is your child's school performance affected by his/her hearing loss/CI(s)?*

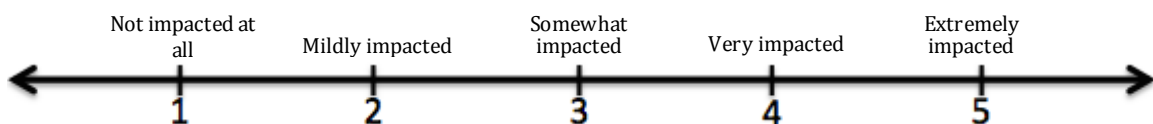

*How often is your child's school performance affected by his/her hearing loss/CI(s)?*

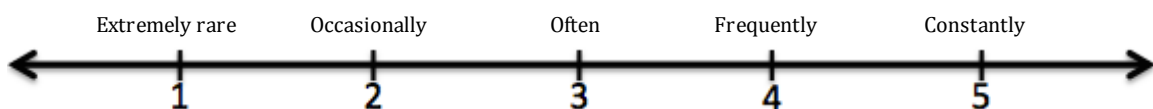

Supplement: NIHMS972028-supplement-Supplemental_Data_File.pdf [file NIHMS972028-supplement-Supplemental_Data_File.pdf]
